# Supplementary material for: miRNA expression changes during the course of neoadjuvant bevacizumab and chemotherapy treatment in breast cancer
Source: PubMed Central journal article supplement (PMC6763780; doi:10.1002/1878-0261.12561), 2019-08-28

# Supplementary figure 1:

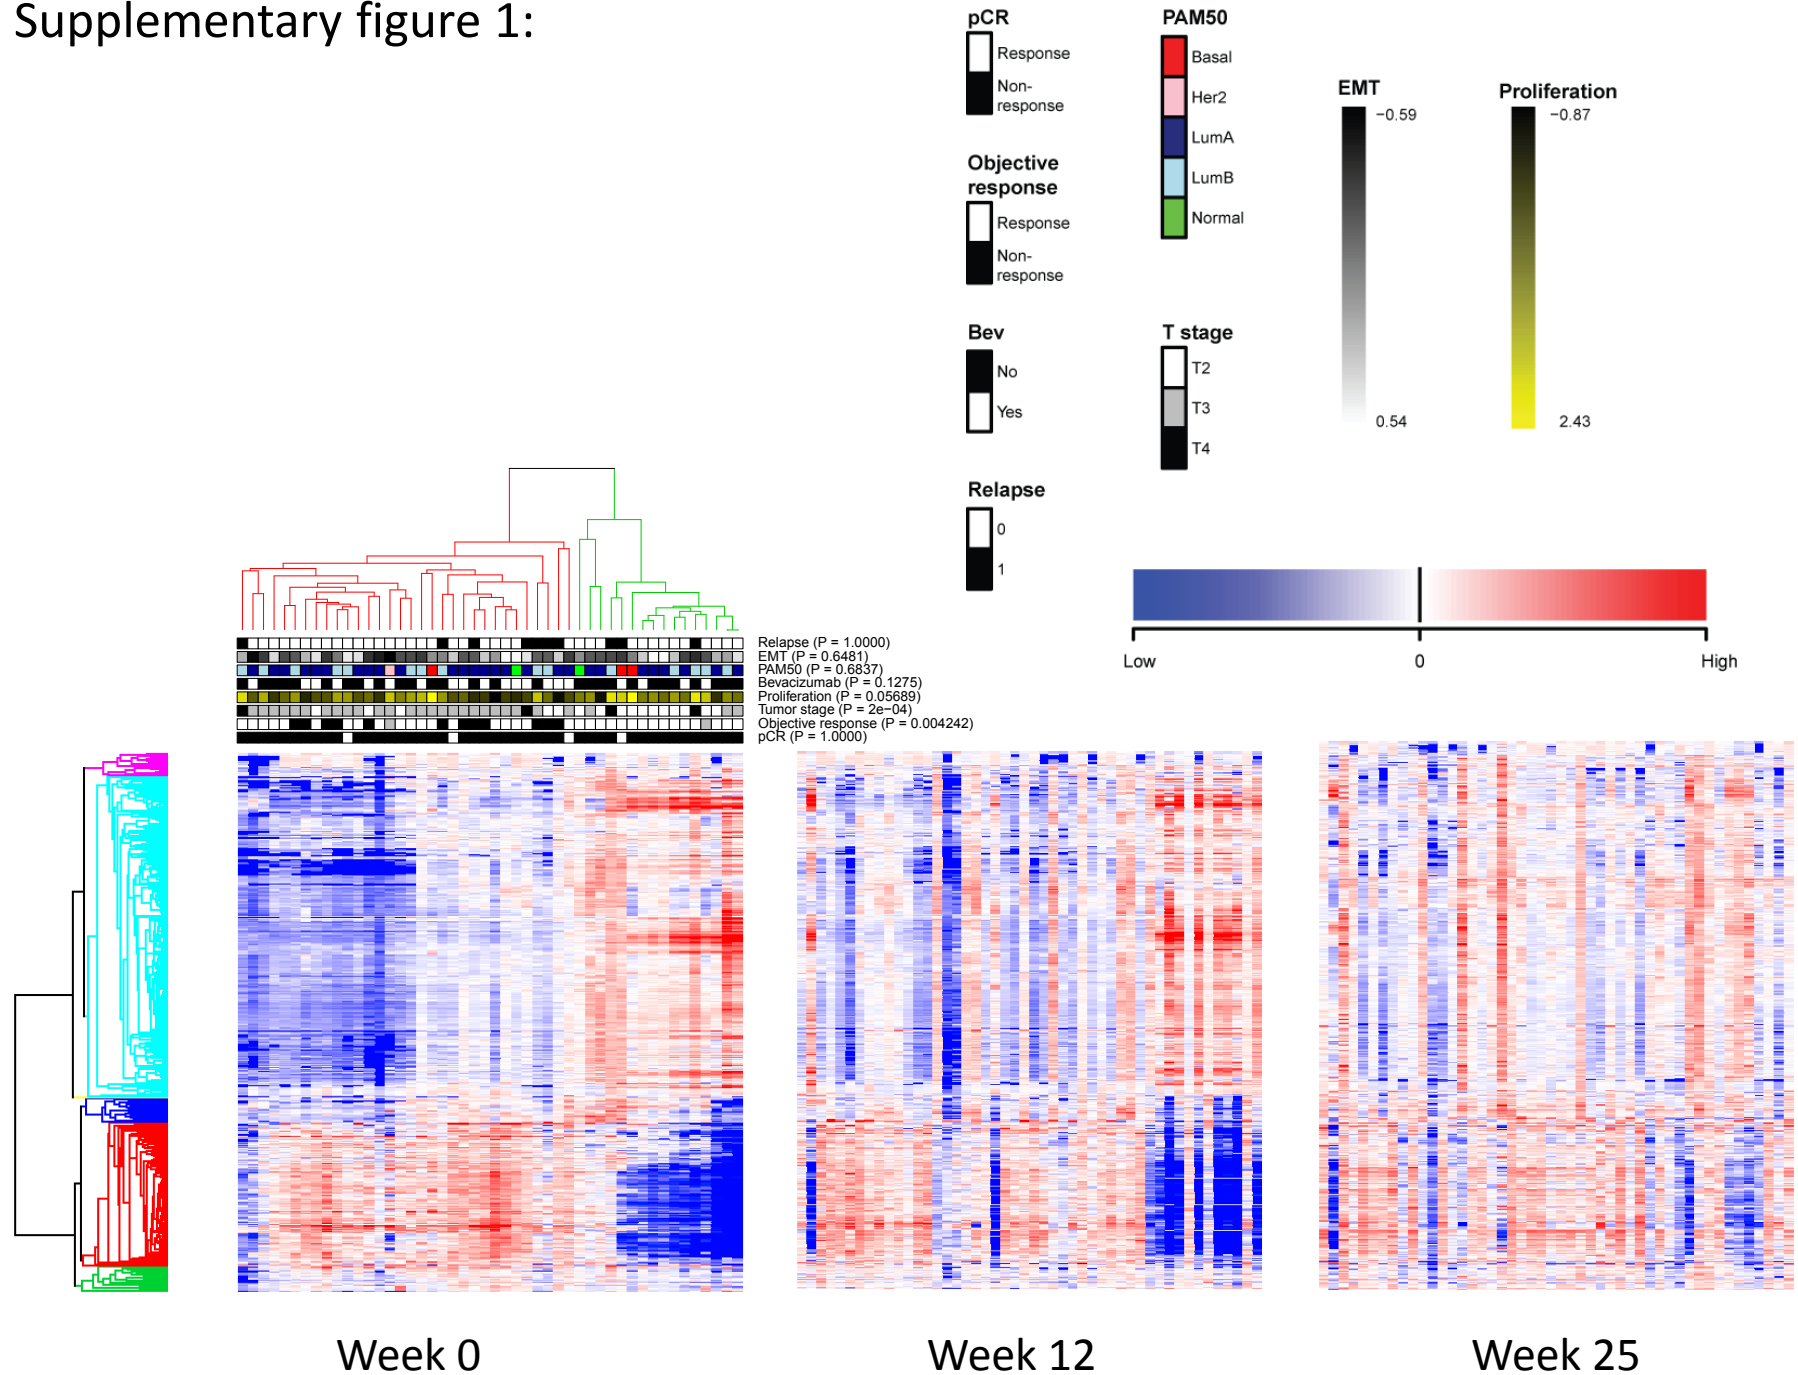

Supplement: MOL2-13-2278-s001.pdf [file MOL2-13-2278-s001.pdf]
